# Supplementary material for: Stepwise photochromism of bisnaphthopyrans exhibiting an excitation intensity-dependent color change
Source: Royal Society of Chemistry journal article supplement (doi:10.1039/c8pp00205c), 2018-05-25
Supplement: c8pp00205c2.pdf [file c8pp00205c2.pdf]

**Electronic Supplementary Information for:**  
**Stepwise Photochromism of Bisnaphthopyrans Exhibiting  
Excitation Intensity-Dependent Color Change**

**Yuki Inagaki,<sup>†</sup> Katsuya Mutoh<sup>†</sup> and Jiro Abe<sup>\*,†</sup>**

<sup>†</sup>*Department of Chemistry, School of Science and Engineering, Aoyama Gakuin University, 5-10-1  
Fuchinobe, Chuo-ku, Sagamihara, Kanagawa 252-5258, Japan*

E-mail: [jiro\\_abe@chem.aoyama.ac.jp](mailto:jiro_abe@chem.aoyama.ac.jp)

**CONTENTS**

|                                                     |            |
|-----------------------------------------------------|------------|
| <b>1. NMR Spectra</b>                               | <b>S2</b>  |
| <b>2. HR-ESI-TOF MS Spectra</b>                     | <b>S6</b>  |
| <b>3. HPLC Chromatograms</b>                        | <b>S9</b>  |
| <b>4. X-ray Crystallographic Analyses</b>           | <b>S10</b> |
| <b>5. Transient Absorption Spectroscopy</b>         | <b>S11</b> |
| <b>6. Plausible Photochromic Reaction of bis-PQ</b> | <b>S14</b> |
| <b>7. References</b>                                | <b>S15</b> |

# 1. NMR Spectra

## <sup>1</sup>H NMR Spectra

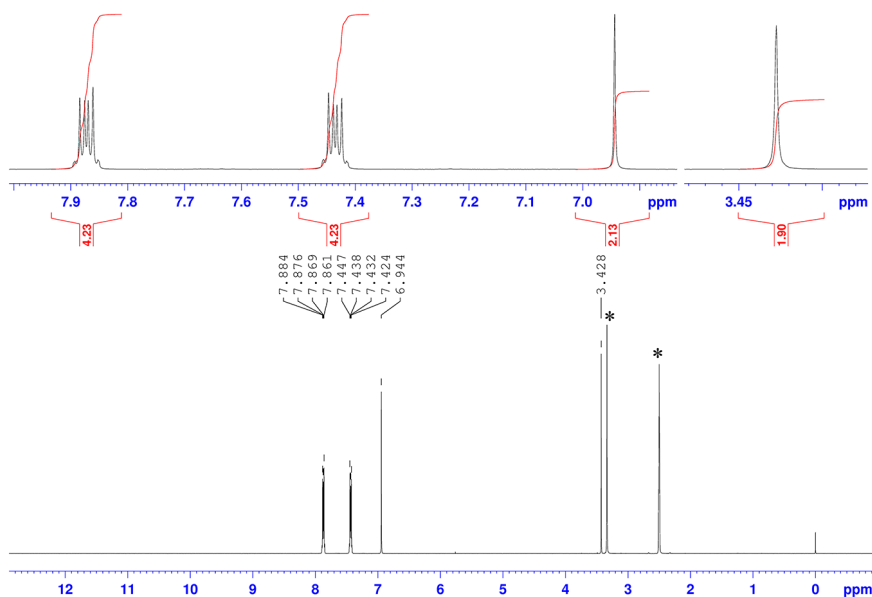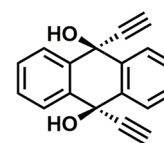

Fig. S1 <sup>1</sup>H NMR spectrum of (9s, 10s)-9,10-diethynyl-9,10-dihydroanthracene-9,10-diol in DMSO-*d*<sub>6</sub> (\* solvent peaks).

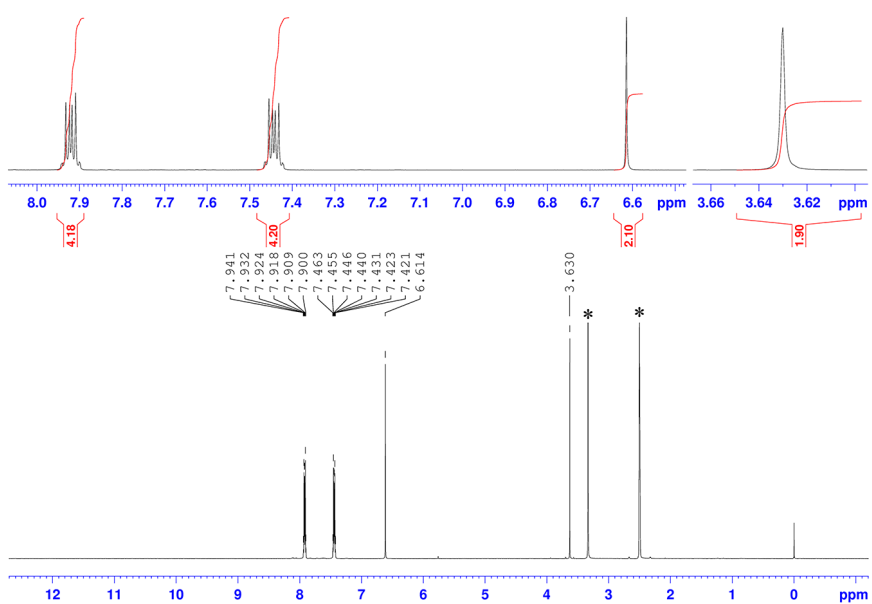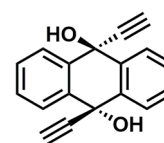

Fig. S2 <sup>1</sup>H NMR spectrum of (9r, 10r)-9,10-diethynyl-9,10-dihydroanthracene-9,10-diol in DMSO-*d*<sub>6</sub> (\* solvent peaks).

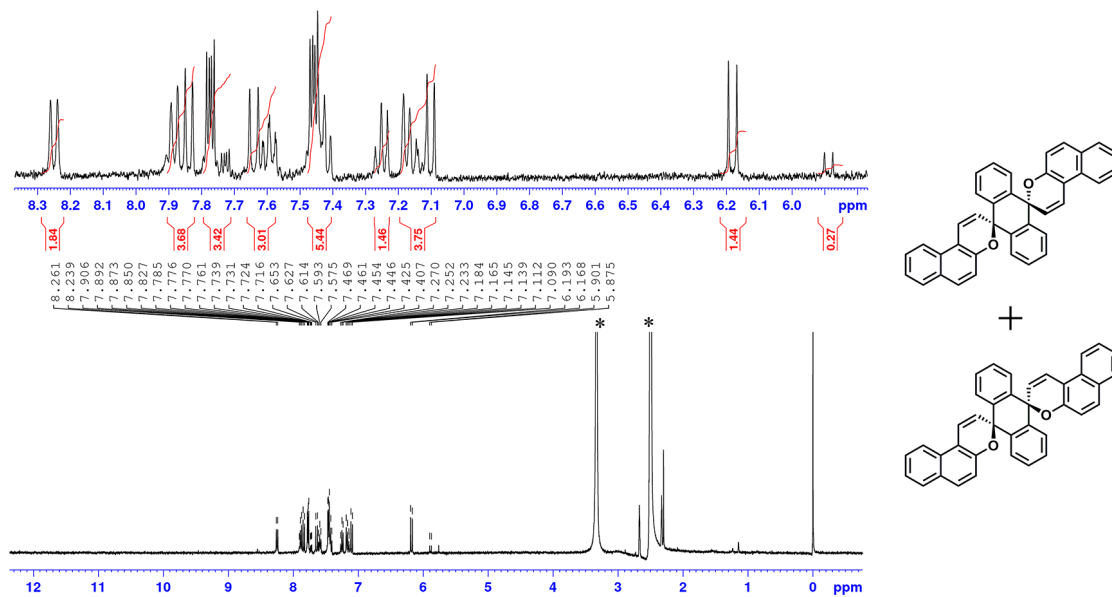

Fig. S3 <sup>1</sup>H NMR spectrum of bis-NP in DMSO-*d*<sub>6</sub> (\* solvent peaks).

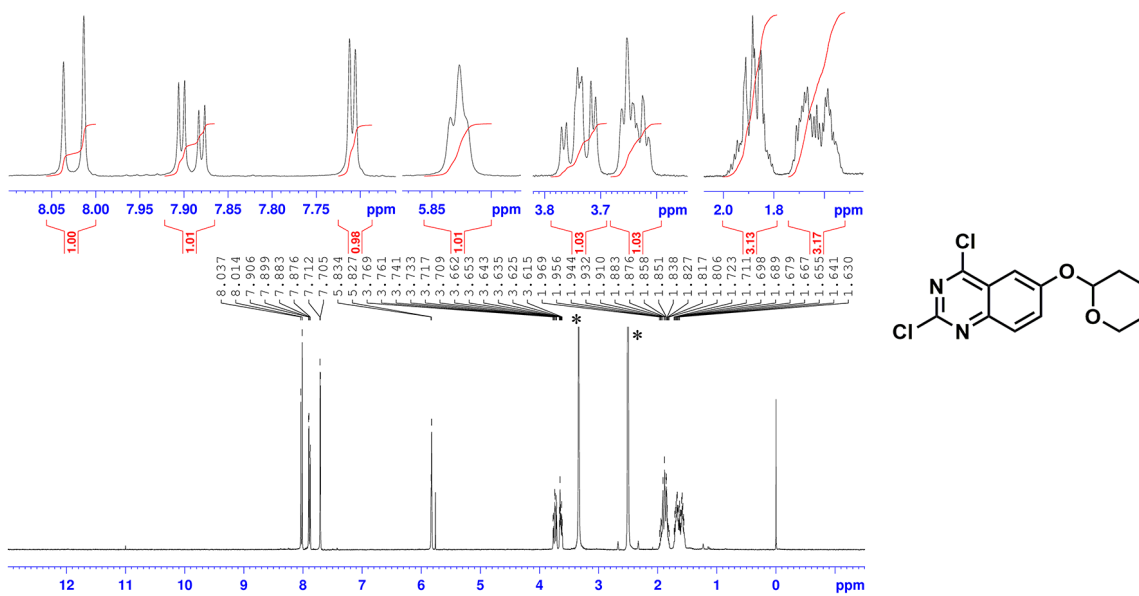

Fig. S4 <sup>1</sup>H NMR spectrum of 2,4-dichloro-6-((tetrahydro-2H-pyran-2-yl)oxy)quinazoline in DMSO-*d*<sub>6</sub> (\* solvent peaks).

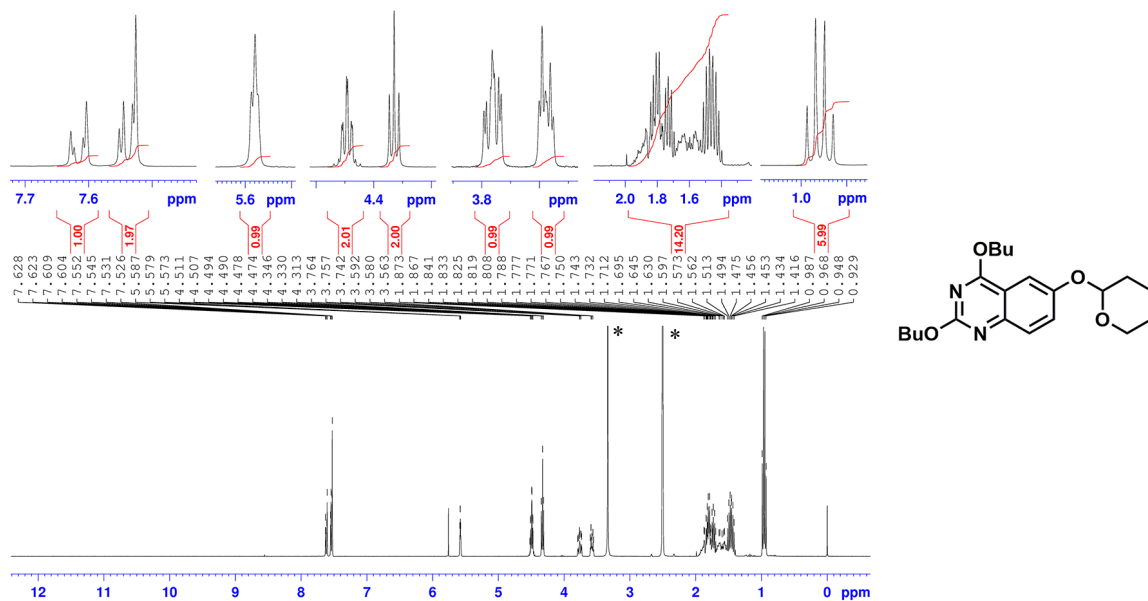

Fig. S5  $^1\text{H}$  NMR spectrum of 2,4-dibutoxy-6-((tetrahydro-2*H*-pyran-2-yl)oxy)quinazoline in  $\text{DMSO-}d_6$  (\* solvent peaks).

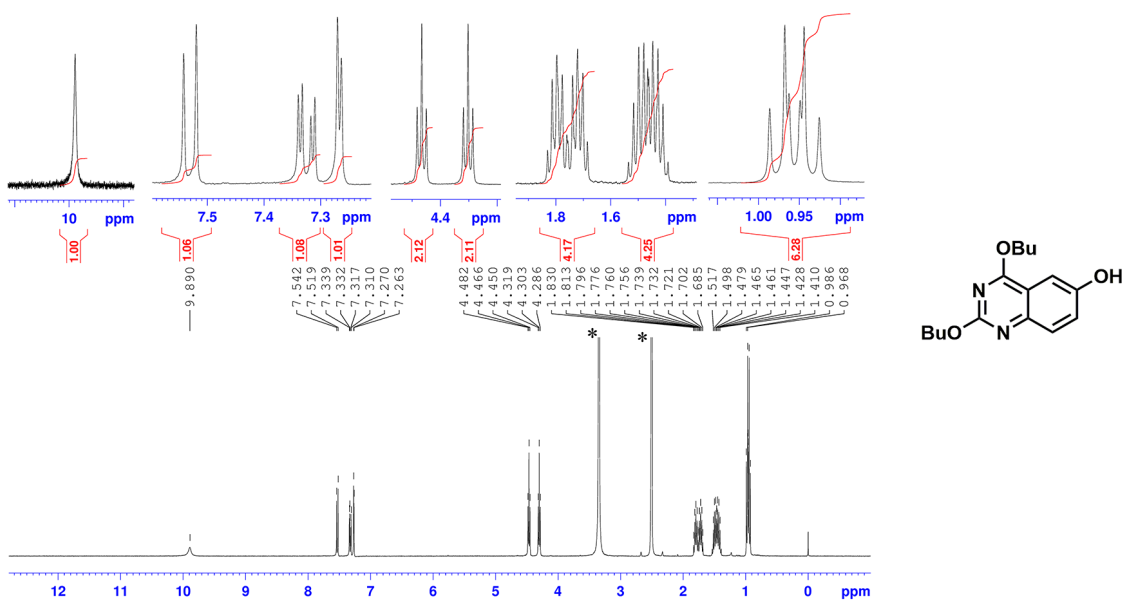

Fig. S6  $^1\text{H}$  NMR spectrum of 2,4-dibutoxyquinazolin-6-ol in  $\text{DMSO-}d_6$  (\* solvent peaks).



## 2. HR-ESI-TOF MS Spectra

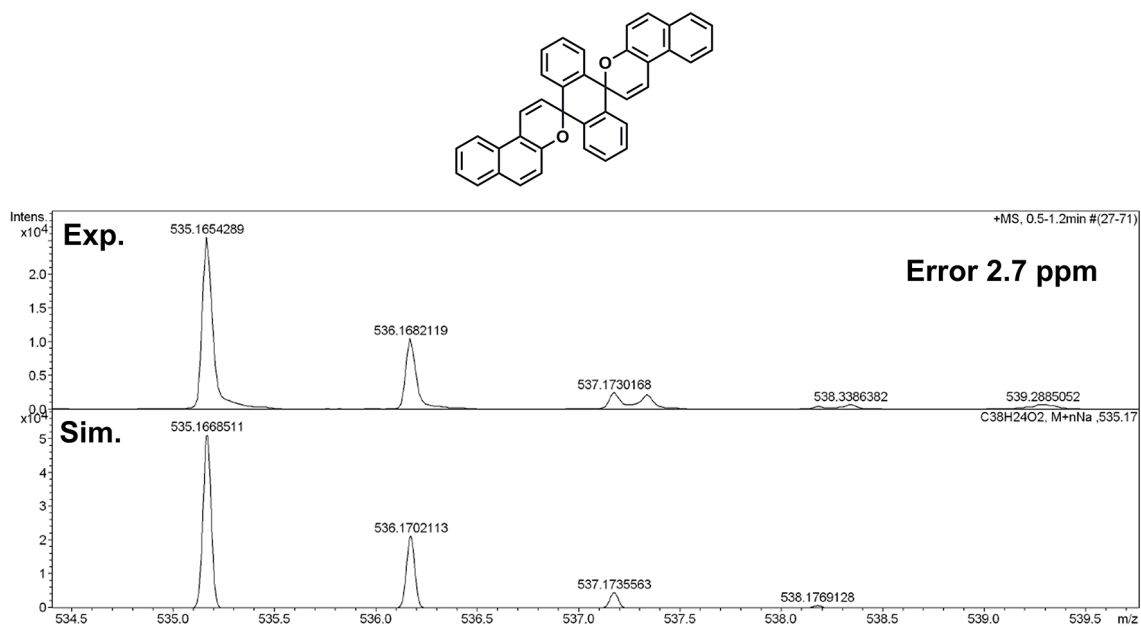

Fig. S9 HR-ESI-TOF MS spectra of bis-NP.

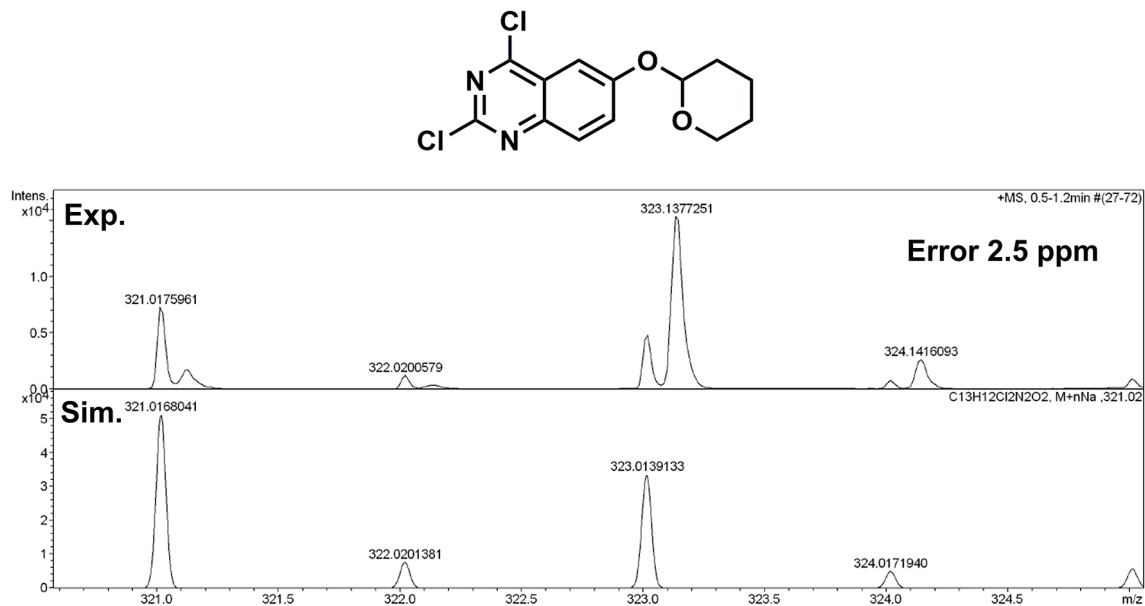

Fig. S10 HR-ESI-TOF MS spectra of 2,4-dichloro-6-((tetrahydro-2H-pyran-2-yl)oxy)quinazoline.

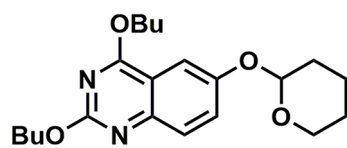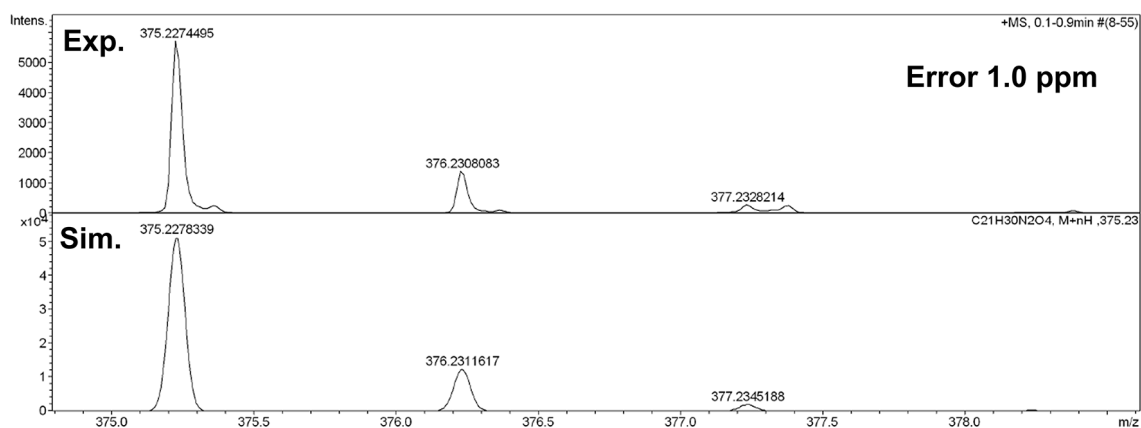

Fig. S11 HR-ESI-TOF MS spectra of 2,4-dibutoxy-6-((tetrahydro-2H-pyran-2-yl)oxy)quinazoline.

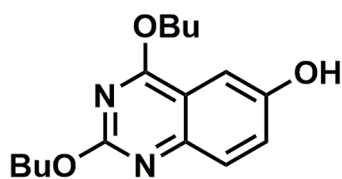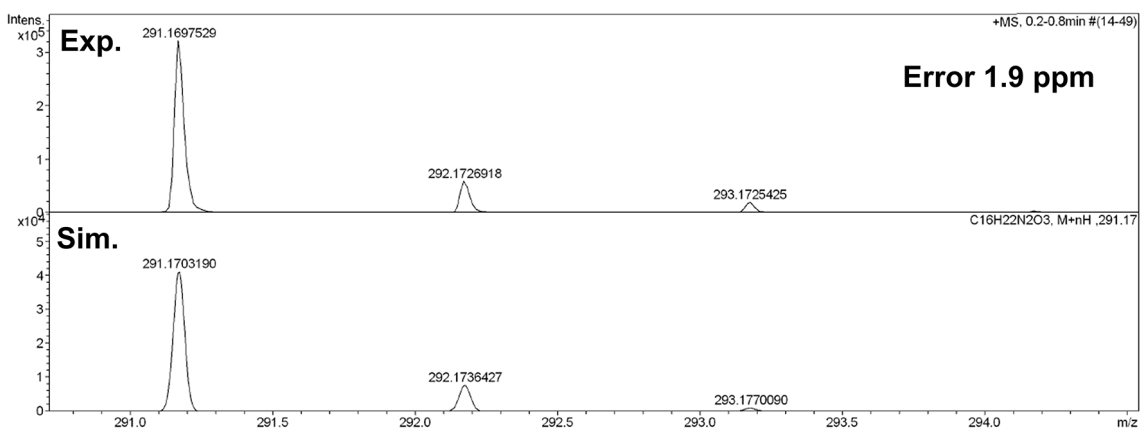

Fig. S12 HR-ESI-TOF MS spectra of 2,4-dibutoxyquinazolin-6-ol.

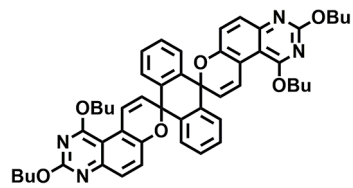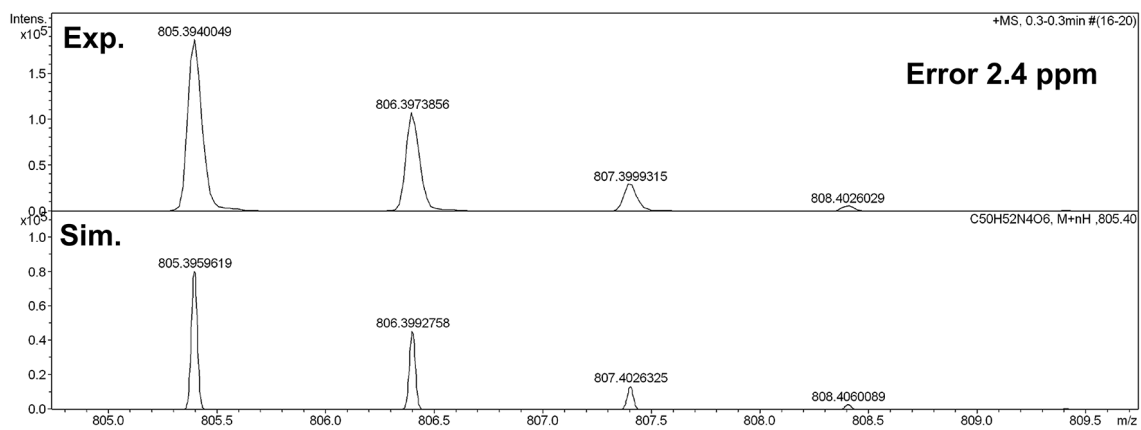

**Fig. S13** HR-ESI-TOF MS spectra of **bis-PQ**.



### 3. HPLC Chromatograms

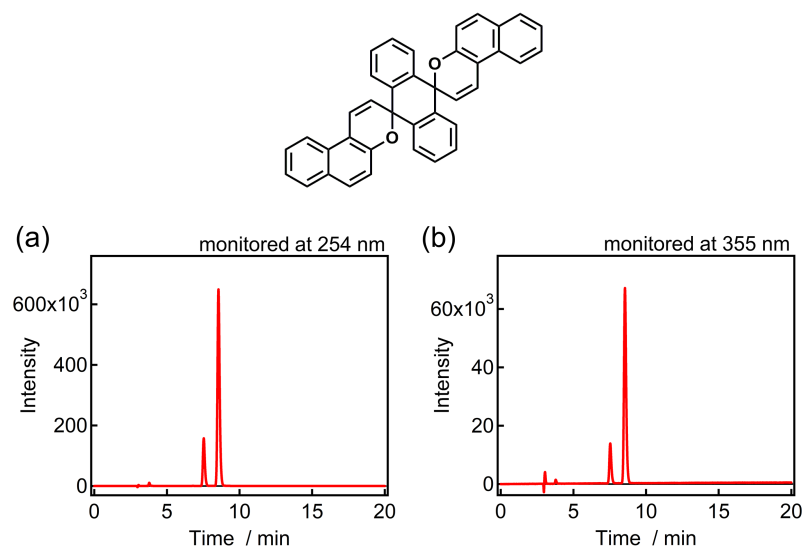

**Fig. S14** HPLC chromatograms of **Bis-NP**; 99 % purity (the ratio of the structural isomers = 1:5). HPLC analysis was performed using a reverse phase analytical column (Mightysil RP18, 25cm×4.6mm, 5µm particle) from Kanto Chemical Industries, equipped with a UV detector; the mobile phase was CH<sub>3</sub>CN with a flow rate of 1.0 mL/min (detection wavelength; 254 and 355 nm).

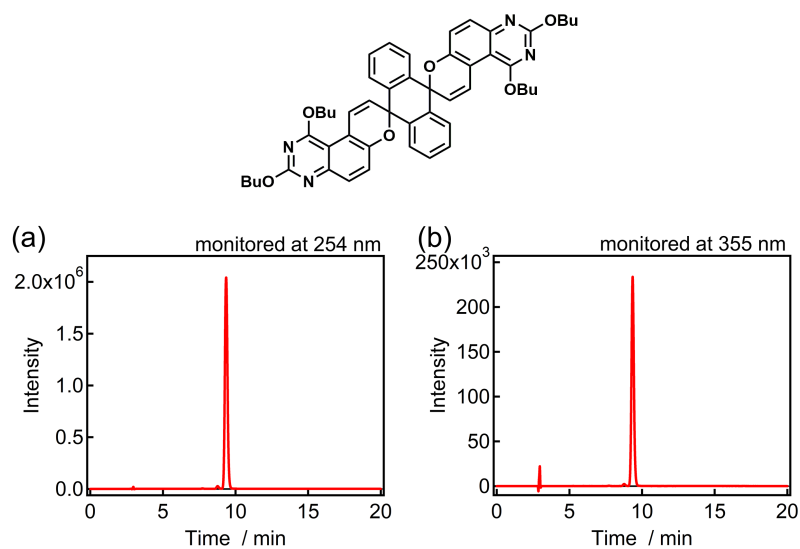

**Fig. S15** HPLC chromatograms of **Bis-PQ**; 99 % purity. HPLC analysis was performed using a reverse phase analytical column (Mightysil RP18, 25cm×4.6mm, 5µm particle) from Kanto Chemical Industries, equipped with a UV detector; the mobile phase was CH<sub>3</sub>CN:THF = 5:1 with a flow rate of 1.0 mL/min (detection wavelength; 254 and 355 nm).

## 4. X-ray Crystallographic Analyses

The diffraction data of the single crystals were collected on the Bruker APEX II CCD area detector (Mo K $\alpha$ ,  $\lambda = 0.71073$  nm). The data refinement was carried out by the Bruker APEXII software package with SHELXT program.<sup>S1</sup> All non-hydrogen atoms were anisotropically refined.

**Table S1.** Crystallographic Parameters of **bis-NP**

|                                   |                                                                                                                        |
|-----------------------------------|------------------------------------------------------------------------------------------------------------------------|
| Empirical formula                 | C <sub>38</sub> H <sub>22.20</sub> O <sub>2</sub>                                                                      |
| Formula weight                    | 512.76                                                                                                                 |
| Temperature                       | 90(0) K                                                                                                                |
| Wavelength                        | 0.71073 Å                                                                                                              |
| Crystal system                    | monoclinic                                                                                                             |
| Space group                       | P 1 21/c 1                                                                                                             |
| Unit cell dimensions              | a = 7.538(2) Å $\alpha = 90^\circ$<br>b = 9.367(3) Å $\beta = 100.039(4)^\circ$<br>c = 18.374(5) Å $\gamma = 90^\circ$ |
| Volume                            | 1277.5(6) Å <sup>3</sup>                                                                                               |
| Z                                 | 2                                                                                                                      |
| Density (calculated)              | 1.328 g/m <sup>3</sup>                                                                                                 |
| Absorption coefficient            | 0.081 mm <sup>-1</sup>                                                                                                 |
| F(000)                            | 532                                                                                                                    |
| Theta range for data collection   | 2.25 to 26.44°                                                                                                         |
| Index ranges                      | -8 <= h <= 9, -11 <= k <= 11, -13 <= l <= 22                                                                           |
| Reflections collected             | 6578                                                                                                                   |
| Independent reflections           | 2616 [R(int) = 0.0446]                                                                                                 |
| Absorption correction             | Empirical                                                                                                              |
| Refinement method                 | Full-matrix least-squares on F <sup>2</sup>                                                                            |
| Data / restraints / parameters    | 2616 / 150 / 60                                                                                                        |
| Goodness-of-fit on F <sup>2</sup> | 1.035                                                                                                                  |
| Final R indices [I > 2sigma(I)]   | R1 = 0.0740, wR2 = 0.1853                                                                                              |
| R indices (all data)              | R1 = 0.0993, wR2 = 0.2043                                                                                              |
| Largest diff. peak and hole       | 0.543 and -0.499 eÅ <sup>-3</sup>                                                                                      |

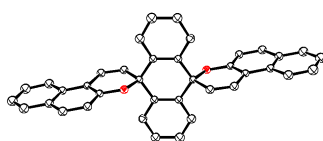

**Fig. S16.** ORTEP representation of the molecular structure of **bis-NP** with thermal ellipsoids (50 % probability), where oxygen atoms are highlighted in red. The hydrogen atoms are omitted for clarity.

## 5. Transient UV–Vis Absorption Spectroscopy

### One Photon Photochromic Reaction

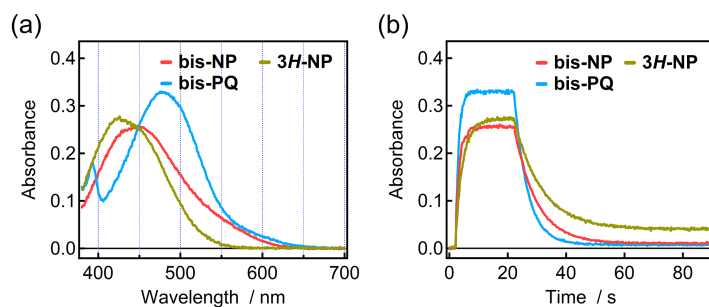

**Fig. S17** (a) The transient absorption spectra of **3H-NP**, **bis-NP** and **bis-PQ** in toluene ( $1.8 \times 10^{-5}$  M) at 298 K upon UV light irradiation (365 nm, 30 mW, for 20 s). (b) Time variations of the absorbance at  $\lambda_{\max}$  of **3H-NP**, **bis-NP** and **bis-PQ** in toluene under UV light irradiation, and the following thermal back fading when the irradiation was stopped. The decay curves were fitted by the monoexponential function (eq 1).

$$f(t) = Ae^{-kt} + C \quad (1)$$

**Table S2.** Photochromic and Reaction Kinetics Parameters of the TC Form and the Formation Ratios of the TT Form of **bis-NP**, **bis-PQ** and **3H-NP**.

|               | $\lambda_{\max}$ [nm] | A    | C                    | $k$ [ $s^{-1}$ ] | $\tau_{1/2}$ [s] | TT form [%] <sup>a</sup> |
|---------------|-----------------------|------|----------------------|------------------|------------------|--------------------------|
| <b>bis-NP</b> | 447                   | 0.24 | $1.0 \times 10^{-2}$ | 0.13             | 5.2              | 4                        |
| <b>bis-PQ</b> | 478                   | 0.32 | $7.5 \times 10^{-3}$ | 0.22             | 3.1              | 2                        |
| <b>3H-NP</b>  | 425                   | 0.23 | $4.0 \times 10^{-2}$ | 0.11             | 6.5              | 15                       |

(a) The formation ratio of the TT form was defined as  $C/(C+A)$  by assuming the molar extinction coefficients of the TC and TT forms are same.

## Dependence of Photochromism on Excitation Intensity and Temperature

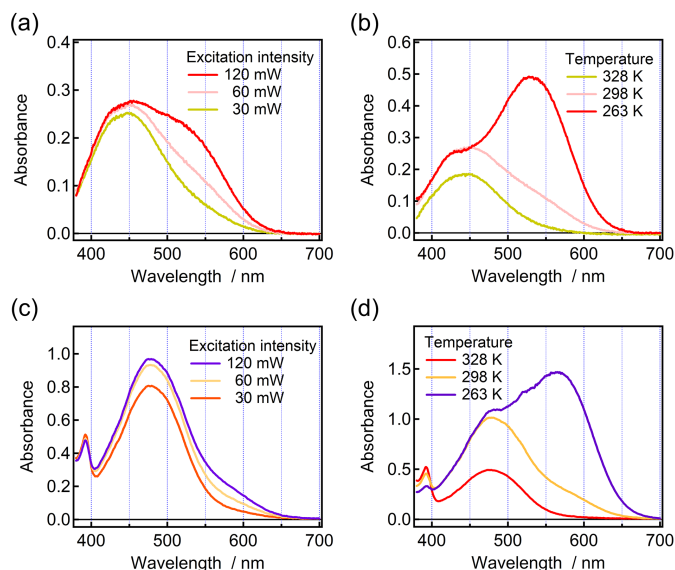

**Fig. S18** UV-Vis absorption spectra of **bis-NP** and **bis-PQ** in toluene ( $1.8 \times 10^{-5}$  M and  $5.0 \times 10^{-5}$  M, respectively) at the PSS (a, c) under CW UV light irradiation (365 nm, 30–120 mW) at 298 K and (b, d) under CW UV light irradiation (365 nm, 120 mW) at 263, 298 and 328 K.

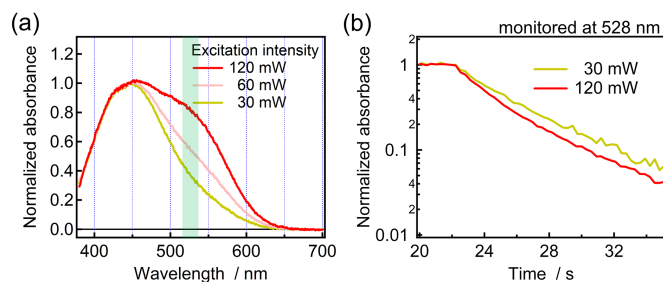

**Fig. S19** (a) UV-Vis absorption spectra of **bis-NP** in toluene ( $1.8 \times 10^{-5}$  M) at the PSS under CW UV light irradiation (365 nm, 30–120 mW) at 298 K. (b) Time variations of the absorbance at 528 nm of **bis-NP** in toluene ( $1.8 \times 10^{-5}$  M) under UV light irradiation (365 nm, 120 mW, for 20 s), and the following thermal back fading when the irradiation was stopped.

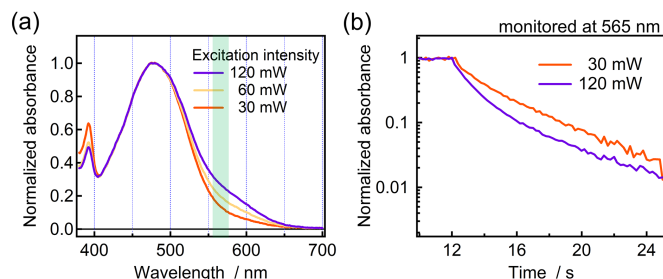

**Fig. S20** (a) UV-Vis absorption spectra of **bis-PQ** in toluene ( $5.0 \times 10^{-5}$  M) at the PSS under CW UV light irradiation (365 nm, 30–120 mW) at 298 K. (b) Time variations of the absorbance at 565 nm of **bis-PQ** in toluene ( $5.0 \times 10^{-5}$  M) under UV light irradiation (365 nm, 120 mW, for 10 s), and the following thermal back fading when the irradiation was stopped.

## Thermal Back Reaction Kinetics of Open-Open Forms

The open-open form of bispyrans is expected to exist as a mixture of TC-TC, TC-TT and TT-TT forms. The formation ratios of the TC and TT forms of **bis-PQ** upon weak UV light irradiation were estimated to be 98% and 2%, respectively (Table S2). The formation ratios of the TC-TC, TC-TT and TT-TT forms of **bis-PQ** can be roughly calculated to be TC-TC:  $0.98 \times 0.98 \times 100 = 96.06\%$ , TC-TT:  $0.98 \times 0.02 \times 2 \times 100 = 3.90\%$  and TT-TT:  $0.02 \times 0.02 \times 100 = 0.04\%$ , respectively, by assuming that: (1) both pyran units in the CC form react independently; (2) the difference in temperature does not affect the production ratios of the TC and TT forms upon UV irradiation and (3) the contributions of TC and TT to the absorption spectrum are equivalent. Therefore, the generation of TT-TT can be neglected. On the other hand, the time profile of the transient absorbance at 610 nm of **bis-PQ** at 263 K can be well fitted by a double exponential function (eq. 2).

$$f(t) = A_1 e^{-k_1 t} + A_2 e^{-k_2 t} \quad (2)$$

The rate constants,  $k_1$  and  $k_2$ , were estimated to be  $10 \text{ min}^{-1}$  and  $1.7 \text{ min}^{-1}$ , respectively. This result suggests that the photogenerated open-open form exists as a mixture of the two structural isomers. By the assumption of (3), the formation ratio of the two structural isomers is experimentally defined as  $A_1:A_2$ , and was estimated to be 30:70. This experimentally estimated formation ratio of the two structural isomers is not consistent with the theoretically expected formation ratio of TC-TC and TC-TT (=96.06:3.90), indicating that the two decay components for the thermal back reaction of the open-open form of **bis-PQ** can be assigned to the two structural isomers of TC-TC as shown in Scheme S1.

The decay curve of the transient absorbance at 591 nm of **bis-NP** at 263 K can be fitted by a double exponential function. The rate constants of the two decay components were estimated to be  $10 \text{ min}^{-1}$  and  $1.7 \text{ min}^{-1}$  and the formation ratio ( $A_1:A_2$ ) was estimated to be 82:18. This estimated formation ratio of the two decay components for **bis-NP** is largely different from that of **bis-PQ**. The formation ratios of the TC-TC, TC-TT and TT-TT forms of **bis-NP** were roughly calculated to be 92.16 %, 7.68 % and 0.16 %, respectively, in the similar manner with the calculation for **bis-PQ**. In contrast to the formation ratio of TC-TT of **bis-PQ**, the large contribution of the formation of TC-TT of **bis-NP** cannot be ignored because the theoretical ratio of TC-TT (7.68%) is relatively close to the experimentally estimated ratio of one of the decay components (18%). Therefore, it is plausible that TC-TT is generated upon UV light irradiation to **bis-NP** in addition to the structural isomers presented in the above discussion for **bis-PQ** (Scheme 2).

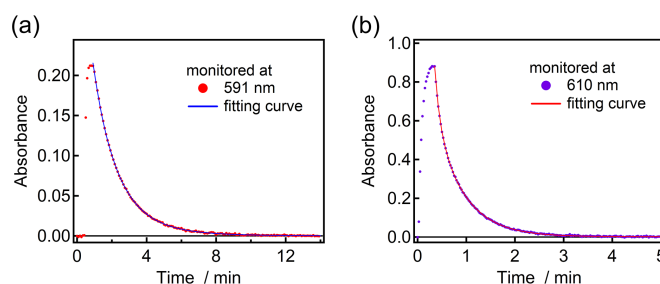

**Fig. S21** Time variations of the absorbance of (a) **bis-NP** at 591 nm and (b) **bis-PQ** at 610 nm in toluene ( $1.8 \times 10^{-5} \text{ M}$  and  $5.0 \times 10^{-5} \text{ M}$ , respectively) at 263 K under UV light irradiation, and the following thermal back fading when the irradiation was stopped. The decay curves were fitted by the double exponential function (eq. 2).

**Table S3.** Reaction Kinetics Parameters for the Thermal Back Reaction of the Open-Open form of **bis-NP** and **bis-PQ** in Toluene ( $1.8 \times 10^{-5}$  M and  $5.0 \times 10^{-5}$  M, respectively) at 263 K.

|               | $A_1$ | $k_1$ | $A_2$ | $k_2$ |
|---------------|-------|-------|-------|-------|
| <b>bis-NP</b> | 0.18  | 0.79  | 0.039 | 0.42  |
| <b>bis-PQ</b> | 0.26  | 10    | 0.62  | 1.7   |

The reaction kinetic parameters were estimated from the fitting curve of the time variation of the absorbance by the double exponential function (eq. 2).

## 6. Plausible Photochromic Reaction

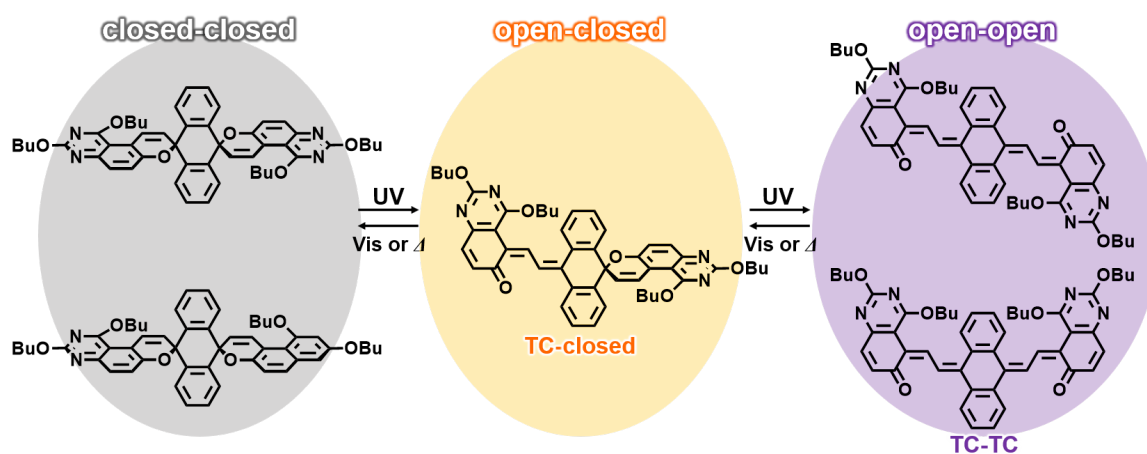

**Scheme S1.** The plausible stepwise two-photon photochromic reaction scheme of **bis-PQ**.

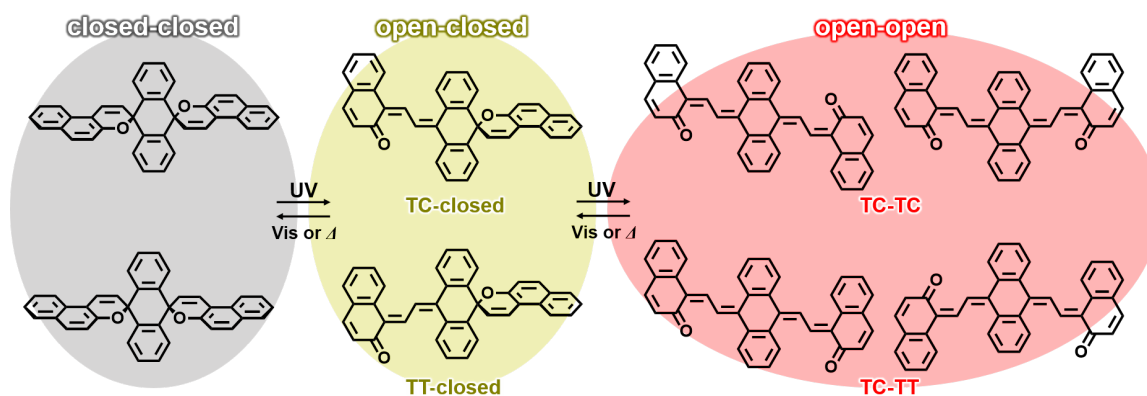

**Scheme S2.** The plausible stepwise two-photon photochromic reaction scheme of **bis-NP**.

## 7. References

- S1. (a) Sheldrick GM. SHELXS-97 and SHELXL-97; University of Gottingen, Germany, 1997.  
 (b) Sheldrick GM. SADABS; University of Gottingen, Germany, 1996.
